# Supplementary material
Source: publisher site journal article supplement (https://www.dovepress.com/article/226586)
Supplement: Supplementary file 1 [file get_supplementary_file.php]

Supplementary file S1: The 38 chronic conditions included

| Chronic condition | ICD-10 codes                                                                                                                                                                                                                                                                                                                                                                                                                                                                                                                                                                                                                                                                           | ATC-codes | Prevalence (%) |
|-------------------|----------------------------------------------------------------------------------------------------------------------------------------------------------------------------------------------------------------------------------------------------------------------------------------------------------------------------------------------------------------------------------------------------------------------------------------------------------------------------------------------------------------------------------------------------------------------------------------------------------------------------------------------------------------------------------------|-----------|----------------|
| Cancer            | C150 C151 C152<br>C153 C154 C155<br>C158 C159 C160<br>C161 C162 C163<br>C164 C165 C166<br>C168 C169 C269<br>C180 C181 C182<br>C183 C184 C185<br>C186 C187 C188<br>C189 C199 C209<br>C210 C211 C212<br>C218 C220 C221<br>C229 C239 C240<br>C241 C248 C249<br>C250 C251 C252<br>C253 C254 C257<br>C258 C259 C320<br>C321 C322 C323<br>C328 C329 C379<br>C340 C341 C342<br>C343 C348 C349<br>C430 C431 C432<br>C433 C434 C435<br>C436 C437 C438<br>C439 C450 C451<br>C452 C457 C459<br>C480 C481 C482<br>C488 C490 C491<br>C492 C494 C495<br>C496 C498 C499<br>C762 C809 C500<br>C501 C502 C503<br>C504 C505 C506<br>C508 C509 C530<br>C531 C532 C533<br>C534 C538 C539<br>C540 C541 C542 |           | 19.9           |

|  |                                                                                                                                                                                                                                                                                                                                                                                                                                                                                                                                                                                                                                                                                                                            |  |  |
|--|----------------------------------------------------------------------------------------------------------------------------------------------------------------------------------------------------------------------------------------------------------------------------------------------------------------------------------------------------------------------------------------------------------------------------------------------------------------------------------------------------------------------------------------------------------------------------------------------------------------------------------------------------------------------------------------------------------------------------|--|--|
|  | C543 C544 C545<br>C546 C547 C548<br>C549 C559 C560<br>C561 C562 C563<br>C569 C619 C649<br>C659 C669 C680<br>C670 C671 C672<br>C673 C674 C675<br>C676 C677 C678<br>C679 C710 C711<br>C712 C713 C714<br>C715 C716 C717<br>C718 C719 C739<br>C740 C741 C749<br>C750 C751 C752<br>C753 C754 C755<br>C758 C759 C770<br>C771 C772 C773<br>C774 C775 C778<br>C779 C780 C781<br>C782 C783 C784<br>C785 C786 C787<br>C790 C791 C792<br>C793 C794 C795<br>C796 C797 C798<br>C810 C811 C812<br>C813 C817 C819<br>C820 C821 C822<br>C827 C829 C830<br>C831 C832 C833<br>C834 C835 C836<br>C837 C838 C839<br>C840 C841 C842<br>C843 C844 C845<br>C850 C851 C857<br>C859 C911 D459<br>C900 C901 C902<br>C910 C911 C912<br>C913 C914 C915 |  |  |
|--|----------------------------------------------------------------------------------------------------------------------------------------------------------------------------------------------------------------------------------------------------------------------------------------------------------------------------------------------------------------------------------------------------------------------------------------------------------------------------------------------------------------------------------------------------------------------------------------------------------------------------------------------------------------------------------------------------------------------------|--|--|

|                                         |                                                                                                                                                                                                    |                                                                                                                |      |
|-----------------------------------------|----------------------------------------------------------------------------------------------------------------------------------------------------------------------------------------------------|----------------------------------------------------------------------------------------------------------------|------|
|                                         | C917 C919 C920<br>C921 C922 C923<br>C924 C925 C927<br>C929 C930 C931<br>C932 C937 C939<br>C940 C941 C942<br>C943 C944 C945<br>C947 C950 C951<br>C952 C957 C959<br>C960 C961 C962<br>C963 C967 C969 |                                                                                                                |      |
| <b>Colitis ulcerosa/Chron's disease</b> | K500 K501 K508<br>K509 K510 K511<br>K512 K513 K514<br>K515 K518 K519<br>K570 K571 K572<br>K573 K574 K575<br>K578 K579                                                                              | A07EC02                                                                                                        | 2.1  |
| <b>Dementia</b>                         | F000 F001 F002<br>F009 F010 F011<br>F012 F013 F018<br>F019 F020 F021<br>F022 F023 F024<br>F028 F039 G300<br>G301 G308 G309<br>G318 G310 G319<br>I694 I693                                          | N06DA02 N06DA03<br>N06DA04 N06DX01                                                                             | 16.1 |
| <b>Depression</b>                       | F320 F321 F322<br>F323 F328 F329<br>F330 F331 F332<br>F333 F334 F338<br>F339 F340 F341<br>F348 F349                                                                                                |                                                                                                                | 7.7  |
| <b>Diabetes</b>                         | E100 E101 E102<br>E103 E104 E105<br>E106 E107 E108<br>E109 E110 E111<br>E112 E113 E114<br>E115 E116 E117                                                                                           | A10AB01 A10AB04<br>A10AB05 A10AB06<br>A10AC01 A10AD01<br>A10AD04 A10AD05<br>A10AD06 A10AE04<br>A10AE05 A10AE06 | 18.9 |

|                                    |                                                                                                                                                                                                                      |                                                                                                                                                                                                                                                                                         |      |
|------------------------------------|----------------------------------------------------------------------------------------------------------------------------------------------------------------------------------------------------------------------|-----------------------------------------------------------------------------------------------------------------------------------------------------------------------------------------------------------------------------------------------------------------------------------------|------|
|                                    | E118 E119 E120<br>E121 E122 E123<br>E124 E125 E126<br>E127 E128 E129<br>E130 E131 E132<br>E133 E134 E135<br>E136 E137 E138<br>E139 E140 E141<br>E142 E143 E144<br>E145 E146 E147<br>E148 E149 E159<br>E161 E162 H360 | A10BA02 A10BB01<br>A10BB03 A10BB07<br>A10BB09 A10BB12<br>A10BD07 A10BD08<br>A10BD09 A10BD10<br>A10BD11 A10BD13<br>A10BD15 A10BD16<br>A10BD20 A10BF<br>A10BG03 A10BH01<br>A10BH02 A10BH03<br>A10BH04 A10BH05<br>A10BX02 A10BX04<br>A10BX07 A10BX09<br>A10BX10 A10BX11<br>A10BX12 A10BX14 |      |
| <b>Disability</b>                  | R672 R673 R679                                                                                                                                                                                                       |                                                                                                                                                                                                                                                                                         | 6.8  |
| <b>Brain infarction/hemorrhage</b> | I600 I601 I602 I603<br>I604 I605 I606 I607<br>I608 I609 I610 I611<br>I612 I613 I614 I615<br>I616 I618 I619 I620<br>I621 I629 I691 I692<br>I630 I631 I632 I633<br>I634 I635 I636 I638<br>I639 I649 I693<br>G459       |                                                                                                                                                                                                                                                                                         | 22.1 |
| <b>Hypertension</b>                | I109 I110 I119 I120<br>I129 I130 I131 I132<br>I139 I150 I151 I152<br>I158 I159                                                                                                                                       |                                                                                                                                                                                                                                                                                         | 44.4 |
| <b>COPD/asthma</b>                 | J409 J410 J411 J418<br>J429 J430 J431 J432<br>J438 J439 J440 J441<br>J448 J449 J479 J450<br>J451 J458 J459 J619<br>J841 J849 J982 J961                                                                               | R03AL03 R03AL04<br>R03AL05 R03AL06<br>R03DX07 R03DX05<br>R03BA08                                                                                                                                                                                                                        | 21.5 |
| <b>Chronic kidney disease</b>      | N030 N031 N032<br>N033 N034 N035<br>N036 N037 N038                                                                                                                                                                   |                                                                                                                                                                                                                                                                                         | 6.4  |

|                                    |                                                                                                                                                                                                                                                                                                                                                                                            |                                               |      |
|------------------------------------|--------------------------------------------------------------------------------------------------------------------------------------------------------------------------------------------------------------------------------------------------------------------------------------------------------------------------------------------------------------------------------------------|-----------------------------------------------|------|
|                                    | N039 N083 N110<br>N111 N118 N119<br>N180 N181 N182<br>N183 N184 N185<br>N188 N189 N199<br>N251 Z992 Z940<br>I823                                                                                                                                                                                                                                                                           |                                               |      |
| <b>Neuropathy</b>                  | G540 G541 G542<br>G543 G544 G545<br>G546 G547 G548<br>G549 G550 G551<br>G552 G553 G558<br>G560 <sup>12</sup> G561 G563<br>G564 G568 G569<br>G570 G571 G572<br>G573 G574 G575<br>G576 G578 G579<br>G580 G587 G588<br>G589 G590 G598<br>G600 G601 G602<br>G603 G608 G609<br>G610 G611 G618<br>G619 G620 G621<br>G622 G628 G629<br>G630 G631 G632<br>G633 G634 G635<br>G636 G638 G649<br>G990 |                                               | 3.1  |
| <b>Osteoporosis/osteoarthritis</b> | G550 G551 G552<br>G553 G558 G952<br>M431 M459 M460<br>M461 M462 M463<br>M464 M465 M468<br>M469 M470 M471<br>M472 M478 M479<br>M480 M481 M482<br>M483 M484 M485<br>M488 M489 M490<br>M491 M492 M493                                                                                                                                                                                         | G03XC01 M05BB03<br>M05BA04 M05BA06<br>M05BA07 | 23.4 |

|                          |                                                                                                                                                                                                                                                                                                                                                    |                                                                                                                                              |     |
|--------------------------|----------------------------------------------------------------------------------------------------------------------------------------------------------------------------------------------------------------------------------------------------------------------------------------------------------------------------------------------------|----------------------------------------------------------------------------------------------------------------------------------------------|-----|
|                          | M494 M495 M498<br>M500 M501 M502<br>M503 M508 M509<br>M510 M511 M512<br>M513 M514 M518<br>M519 M533 M533B<br>M539 M543 M544<br>M545 S336 M513<br>M810 M811 M812<br>M813 M814 M815<br>M816 M818 M819<br>M820 M821 M828                                                                                                                              |                                                                                                                                              |     |
| <b>Parkinson disease</b> | G209 G210 G211<br>G212 G213 G214<br>G218 G219 G229<br>G232                                                                                                                                                                                                                                                                                         | N04BA02 N04BA03<br>N04BC01 N04BC04<br>N04BC05 N04BC06<br>N04BC07 N04BC09<br>N04BD01 N04BD02<br>N04BX01 N04BX02<br>N04BC07 N04BC06<br>N04BC04 | 5.8 |
| <b>Arthritis</b>         | M050 M051 M052<br>M053 M058 M059<br>M060 M061 M062<br>M063 M068 M069<br>M080 M081 M082<br>M083 M084 M088<br>M089 M070 M071<br>M072 M073 M074<br>M075 M076 M100<br>M101 M102 M103<br>M104 M109 M110<br>M111 M112 M118<br>M119 M121 M123<br>M124 M125 M126<br>M127 M128 M129<br>M130 M131 M138<br>M139 M140 M141<br>M142 M143 M144<br>M145 M146 M148 | L04AA13                                                                                                                                      | 8.1 |

|                                        |                                                                                                                                                                                                                                                                                                                                                                                        |                                                                                                                           |      |
|----------------------------------------|----------------------------------------------------------------------------------------------------------------------------------------------------------------------------------------------------------------------------------------------------------------------------------------------------------------------------------------------------------------------------------------|---------------------------------------------------------------------------------------------------------------------------|------|
|                                        | M300 M313 M315<br>M316 M319 M329<br>M459 L930 M150<br>M151 M152 M153<br>M154 M158 M159<br>M160 M161 M162<br>M163 M164 M165<br>M166 M167 M169<br>M170 M171 M172<br>M173 M174 M175<br>M179 M180 M181<br>M182 M183 M184<br>M185 M189 M190<br>M191 M192 M198<br>M199 M232 M201<br>M239 M479                                                                                                |                                                                                                                           |      |
| <b>Disorders of the eyes and ears</b>  | H250 H251 H252<br>H258 H259 H260<br>H261 H262 H263<br>H264 H268 H269<br>H262 H400 H401<br>H402 H403 H404<br>H405 H406 H408<br>H409 H420 H428<br>H445 H350 H351<br>H352 H353 H354<br>H355 H356 H357<br>H358 H359 H800<br>H801 H802 H808<br>H809 H810 H811<br>H812 H813 H814<br>H818 H819 H829<br>H900 H901 H902<br>H903 H904 H905<br>H906 H907 H908<br>H910 H913 H918<br>H919 H933 H938 | S01EA05 S01ED51<br>S01ED02 S01EC04<br>S01EC01 S01EC03<br>S01EB51 S01EE04<br>S01EE01 S01EE03<br>S01ED01 S01EC54<br>S01EE05 | 28.4 |
| <b>Mental disorders due to tobacco</b> | F170 F171 F172<br>F178 F179                                                                                                                                                                                                                                                                                                                                                            |                                                                                                                           | 1.6  |

|                                        |                                                                                                                                                                                                        |                                               |      |
|----------------------------------------|--------------------------------------------------------------------------------------------------------------------------------------------------------------------------------------------------------|-----------------------------------------------|------|
| <b>Thyroid dysfunction</b>             | E010 E011 E012<br>E018 E029 E030<br>E031 E032 E033<br>E038 E039 E040<br>E041 E042 E048<br>E049 E050 E051<br>E052 E053 E054<br>E055 E058 E059<br>E060 E061 E062<br>E063 E064 E065<br>E069 I248          | H03AA01 H03BA02<br>H03BB01 H03BB02<br>H03CA   | 11.6 |
| <b>Mental disorders due to alcohol</b> | F101 F102 F103<br>F104 F105 F106<br>F107 F108 F109<br>G312 K700 K701<br>K702 K703 K704<br>K709 K860                                                                                                    | N07BB01 N07BB03<br>N07BB05                    | 5.4  |
| <b>Obesity</b>                         | E660 E661 E662<br>E668 E669                                                                                                                                                                            | A08AB01 A08AA03                               | 5.1  |
| <b>Gastritis</b>                       | K210 K219 K221<br>K222 K254 K255<br>K256 K257 K258<br>K259 K264 K265<br>K266 K267 K268<br>K269 K274 K275<br>K276 K277 K278<br>K279 K284 K285<br>K286 K287 K288<br>K289 K292 K293<br>K294 K295          |                                               | 8.2  |
| <b>Cardiac disease</b>                 | I062 I080 I081 I082<br>I083 I088 I089 I340<br>I341 I342 I348 I349<br>I350 I351 I352 I358<br>I359 I360 I361 I362<br>I368 I369 I370 I371<br>I372 I378 I379 Z952<br>Z953 Z954 I099<br>I420 I421 I422 I423 | C01EB10 C01DA02<br>C01DA14 C01DX16<br>C01CA07 | 57.0 |



|                                                |                                                                                                                                                                                                                                                                                                                                                                                                                                                                                  |                                                                                                                                                                                                                                             |      |
|------------------------------------------------|----------------------------------------------------------------------------------------------------------------------------------------------------------------------------------------------------------------------------------------------------------------------------------------------------------------------------------------------------------------------------------------------------------------------------------------------------------------------------------|---------------------------------------------------------------------------------------------------------------------------------------------------------------------------------------------------------------------------------------------|------|
|                                                | I424 I425 I426 I427<br>I428 I429 I500 I501<br>I200 I201 I208 I209<br>I248 I250 I251 I252<br>I253 I254 I255 I256<br>I258 I259 I210 I211<br>I212 I213 I214 I219<br>I230 I231 I232 I233<br>I234 I235 I236 I238<br>I260 I269 I270 I279<br>I440 I441 I442 I443<br>I444 I445 I446 I447<br>I450 I451 I452 I453<br>I454 I455 I456 I458<br>I459 I470 I471 I472<br>I479 I481 I482 I489<br>I490 I491 I492 I494<br>I495 I498 I499 Z950<br>I510 I511 I512 I513<br>I514 I515 I517 I518<br>I519 |                                                                                                                                                                                                                                             |      |
| <b>Disorders of the lipoprotein metabolism</b> | E780 E781 E782<br>E783 E784 E785<br>E786 E788 E789<br>I652 I650 I651 I653<br>I658 I659 I660 I661<br>I662 I663 I664 I668<br>I669 I672 I700 I701<br>I702 I708 I709 I738<br>I739 I740 I741 I742<br>I743 I744 I745 I748<br>I749 K551 I710 I711<br>I712 I713 I714 I715<br>I716 I718 I719 I729                                                                                                                                                                                         | C10AA01 C10AA02<br>C10AA03 C10AA04<br>C10AA05 C10AA07<br>C10AB02 C10AB04<br>C10AC02 C10AC04<br>C10AD06 C10AX09<br>C10AX13 C10BA02<br>C10BA05 B01AC30<br>B01AC24 B01AC04<br>B01AC07 B01AC22<br>B01AC09 B01AC06<br>B01AC11 B01AC16<br>B01AC13 | 75.3 |
| <b>Genitourinary diseases</b>                  | N393 N394 R329<br>N409 N411 N810<br>N811 N812 N813<br>N814 N815 N816                                                                                                                                                                                                                                                                                                                                                                                                             | G04CA02 G04CA53<br>G04CA01 G04CB02<br>G04CA52 G04CB01                                                                                                                                                                                       | 23.0 |

|                                                      |                                                                                                                                                           |         |     |
|------------------------------------------------------|-----------------------------------------------------------------------------------------------------------------------------------------------------------|---------|-----|
|                                                      | N817 N818 N819<br>N950                                                                                                                                    |         |     |
| <b>Senility</b>                                      | R549                                                                                                                                                      |         | 0.1 |
| <b>Ulcer of the skin</b>                             | L890 L891 L892<br>L893 L899 L979<br>L984                                                                                                                  |         | 3.6 |
| <b>Liver-, gallbladder- and<br/>pancreas disease</b> | K721 K730 K731<br>K732 K738 K739<br>K740 K741 K742<br>K743 K744 K745<br>K746 K758 K761<br>K766 K767 K778<br>K830 K861 K862<br>K863 K868 K869<br>K870 K871 |         | 1.6 |
| <b>Chronic periodontitis and<br/>gingivitis</b>      | K045 K051 K053                                                                                                                                            |         | 1.7 |
| <b>Chronic sinusitis</b>                             | J320 J321 J322 J323<br>J324 J328 J329                                                                                                                     |         | 0.4 |
| <b>Epilepsy</b>                                      | G400 G401 G402<br>G403 G404 G405<br>G406 G407 G408<br>G409                                                                                                | N03AD01 | 3.1 |
| <b>Multiple sclerosis</b>                            | G359                                                                                                                                                      |         | 0.4 |
| <b>Sleep disorder</b>                                | F510 F511 F512<br>F513 F514 F515<br>F518 F519 G473<br>G478                                                                                                |         | 1.1 |
| <b>Anxiety</b>                                       | F400 F401 F402<br>F408 F409 F410<br>F411 F412 F413<br>F418 F419 F420<br>F421 F422 F428<br>F429                                                            | N05BE01 | 1.6 |
| <b>Mental and behavioral<br/>disorders</b>           | F200 F201 F202<br>F203 F204 F205<br>F206 F208 F209<br>F219 F220 F228                                                                                      |         | 1.6 |

|                                  |                                                                                                                                                                                                                                                                                              |  |     |
|----------------------------------|----------------------------------------------------------------------------------------------------------------------------------------------------------------------------------------------------------------------------------------------------------------------------------------------|--|-----|
|                                  | F229 F250 F251<br>F252 F258 F259<br>F299 F310 F311<br>F312 F313 F314<br>F315 F316 F317<br>F318 F319 F349<br>F999                                                                                                                                                                             |  |     |
| <b>Delirium</b>                  | F050 F051 F058<br>F059                                                                                                                                                                                                                                                                       |  | 2.0 |
| <b>Vitamin-D deficiency</b>      | E559                                                                                                                                                                                                                                                                                         |  | 1.5 |
| <b>Malnutrition and cachexia</b> | E419 E429 E441<br>E469 E470 R649                                                                                                                                                                                                                                                             |  | 0.6 |
| <b>Parathyroidism</b>            | E200 E209 E210<br>E211 E213                                                                                                                                                                                                                                                                  |  | 0.8 |
| <b>Anemia</b>                    | D500 D550 D551<br>D552 D553 D558<br>D559 D560 D561<br>D563 D569 D570<br>D571 D573 D578<br>D580 D581 D582<br>D588 D589 D590<br>D591 D592 D593<br>D594 D595 D596<br>D597 D598 D599<br>D600 D601 D608<br>D609 D610 D611<br>D612 D613 D618<br>D619 D630 D638<br>D640 D641 D642<br>D643 D648 D649 |  | 1.5 |

Supplementary file S2: The 22 chronic conditions covering 95% of the chronic conditions in the cohort

| Chronic condition | ICD-10 codes                                                                                                                             | ATC-codes |
|-------------------|------------------------------------------------------------------------------------------------------------------------------------------|-----------|
| <b>Cancer</b>     | C150 C151 C152 C153 C154<br>C155 C158 C159 C160 C161<br>C162 C163 C164 C165 C166<br>C168 C169 C269 C180 C181<br>C182 C183 C184 C185 C186 |           |

|  |                                                                                                                                                                                                                                                                                                                                                                                                                                                                                                                                                                                                                                                                                                                                                                                                                                                                                                                                                                                                                                                                                                                                  |  |
|--|----------------------------------------------------------------------------------------------------------------------------------------------------------------------------------------------------------------------------------------------------------------------------------------------------------------------------------------------------------------------------------------------------------------------------------------------------------------------------------------------------------------------------------------------------------------------------------------------------------------------------------------------------------------------------------------------------------------------------------------------------------------------------------------------------------------------------------------------------------------------------------------------------------------------------------------------------------------------------------------------------------------------------------------------------------------------------------------------------------------------------------|--|
|  | C187 C188 C189 C199 C209<br>C210 C211 C212 C218 C220<br>C221 C229 C239 C240 C241<br>C248 C249 C250 C251 C252<br>C253 C254 C257 C258 C259<br>C320 C321 C322 C323 C328<br>C329 C379 C340 C341 C342<br>C343 C348 C349 C430 C431<br>C432 C433 C434 C435 C436<br>C437 C438 C439 C450 C451<br>C452 C457 C459 C480 C481<br>C482 C488 C490 C491 C492<br>C494 C495 C496 C498 C499<br>C762 C809 C500 C501 C502<br>C503 C504 C505 C506 C508<br>C509 C530 C531 C532 C533<br>C534 C538 C539 C540 C541<br>C542 C543 C544 C545 C546<br>C547 C548 C549 C559 C560<br>C561 C562 C563 C569 C619<br>C649 C659 C669 C680 C670<br>C671 C672 C673 C674 C675<br>C676 C677 C678 C679 C710<br>C711 C712 C713 C714 C715<br>C716 C717 C718 C719 C739<br>C740 C741 C749 C750 C751<br>C752 C753 C754 C755 C758<br>C759 C770 C771 C772 C773<br>C774 C775 C778 C779 C780<br>C781 C782 C783 C784 C785<br>C786 C787 C790 C791 C792<br>C793 C794 C795 C796 C797<br>C798 C810 C811 C812 C813<br>C817 C819 C820 C821 C822<br>C827 C829 C830 C831 C832<br>C833 C834 C835 C836 C837<br>C838 C839 C840 C841 C842<br>C843 C844 C845 C850 C851<br>C857 C859 C911 D459 C900 |  |
|--|----------------------------------------------------------------------------------------------------------------------------------------------------------------------------------------------------------------------------------------------------------------------------------------------------------------------------------------------------------------------------------------------------------------------------------------------------------------------------------------------------------------------------------------------------------------------------------------------------------------------------------------------------------------------------------------------------------------------------------------------------------------------------------------------------------------------------------------------------------------------------------------------------------------------------------------------------------------------------------------------------------------------------------------------------------------------------------------------------------------------------------|--|

|                                    |                                                                                                                                                                                                                                                                                                             |                                                                                                                                                                                                                                                                                                                                                                                      |
|------------------------------------|-------------------------------------------------------------------------------------------------------------------------------------------------------------------------------------------------------------------------------------------------------------------------------------------------------------|--------------------------------------------------------------------------------------------------------------------------------------------------------------------------------------------------------------------------------------------------------------------------------------------------------------------------------------------------------------------------------------|
|                                    | C901 C902 C910 C911 C912<br>C913 C914 C915 C917 C919<br>C920 C921 C922 C923 C924<br>C925 C927 C929 C930 C931<br>C932 C937 C939 C940 C941<br>C942 C943 C944 C945 C947<br>C950 C951 C952 C957 C959<br>C960 C961 C962 C963 C967<br>C969                                                                        |                                                                                                                                                                                                                                                                                                                                                                                      |
| <b>Ulcer of the skin</b>           | L890 L891 L892 L893 L899                                                                                                                                                                                                                                                                                    |                                                                                                                                                                                                                                                                                                                                                                                      |
| <b>Dementia</b>                    | F000 F001 F002 F009 F010<br>F011 F012 F013 F018 F019<br>F020 F021 F022 F023 F024<br>F028 F039 G300 G301 G308<br>G309 G318 G310 G319 I694<br>I693                                                                                                                                                            | N06DA02 N06DA03<br>N06DA04 N06DX01                                                                                                                                                                                                                                                                                                                                                   |
| <b>Depression</b>                  | F320 F321 F322 F323 F328<br>F329 F330 F331 F332 F333<br>F334 F338 F339 F340 F341<br>F348 F349                                                                                                                                                                                                               |                                                                                                                                                                                                                                                                                                                                                                                      |
| <b>Diabetes</b>                    | E100 E101 E102 E103 E104<br>E105 E106 E107 E108 E109<br>E110 E111 E112 E113 E114<br>E115 E116 E117 E118 E119<br>E120 E121 E122 E123 E124<br>E125 E126 E127 E128 E129<br>E130 E131 E132 E133 E134<br>E135 E136 E137 E138 E139<br>E140 E141 E142 E143 E144<br>E145 E146 E147 E148 E149<br>E159 E161 E162 H360 | A10AB01 A10AB04 A10AB05<br>A10AB06 A10AC01 A10AD01<br>A10AD04 A10AD05 A10AD06<br>A10AE04 A10AE05 A10AE06<br>A10BA02 A10BB01 A10BB03<br>A10BB07 A10BB09 A10BB12<br>A10BD07 A10BD08 A10BD09<br>A10BD10 A10BD11 A10BD13<br>A10BD15 A10BD16 A10BD20<br>A10BF A10BG03 A10BH01<br>A10BH02 A10BH03 A10BH04<br>A10BH05 A10BX02 A10BX04<br>A10BX07 A10BX09 A10BX10<br>A10BX11 A10BX12 A10BX14 |
| <b>Disability</b>                  | R672 R673 R679                                                                                                                                                                                                                                                                                              |                                                                                                                                                                                                                                                                                                                                                                                      |
| <b>Brain infarction/hemorrhage</b> | I600 I601 I602 I603 I604 I605<br>I606 I607 I608 I609 I610 I611<br>I612 I613 I614 I615 I616 I618<br>I619 I620 I621 I629 I691 I692                                                                                                                                                                            |                                                                                                                                                                                                                                                                                                                                                                                      |

|                                    |                                                                                                                                                                                                                                                                                                                                                                                                           |                                                                               |
|------------------------------------|-----------------------------------------------------------------------------------------------------------------------------------------------------------------------------------------------------------------------------------------------------------------------------------------------------------------------------------------------------------------------------------------------------------|-------------------------------------------------------------------------------|
|                                    | I630 I631 I632 I633 I634 I635<br>I636 I638 I639 I649 I693<br>G459                                                                                                                                                                                                                                                                                                                                         |                                                                               |
| <b>Hypertension</b>                | I109 I110 I119 I120 I129 I130<br>I131 I132 I139 I150 I151 I152<br>I158 I159                                                                                                                                                                                                                                                                                                                               |                                                                               |
| <b>COPD/asthma</b>                 | J409 J410 J411 J418 J429<br>J430 J431 J432 J438 J439<br>J440 J441 J448 J449 J479<br>J450 J451 J458 J459 J619<br>J841 J849 J982 J961                                                                                                                                                                                                                                                                       | R03AL03 R03AL04 R03AL05<br>R03AL06 R03DX07 R03DX05<br>R03BA08                 |
| <b>Chronic kidney disease</b>      | N030 N031 N032 N033 N034<br>N035 N036 N037 N038 N039<br>N083 N110 N111 N118 N119<br>N180 N181 N182 N183 N184<br>N185 N188 N189 N199 N251<br>Z992 Z940 I823                                                                                                                                                                                                                                                |                                                                               |
|                                    |                                                                                                                                                                                                                                                                                                                                                                                                           |                                                                               |
| <b>Osteoporosis/osteoarthritis</b> | G550 G551 G552 G553 G558<br>G952 M431 M459 M460<br>M461 M462 M463 M464<br>M465 M468 M469 M470<br>M471 M472 M478 M479<br>M480 M481 M482 M483<br>M484 M485 M488 M489<br>M490 M491 M492 M493<br>M494 M495 M498 M500<br>M501 M502 M503 M508<br>M509 M510 M511 M512<br>M513 M514 M518 M519<br>M533 M533B M539 M543<br>M544 M545 S336 M513<br>M810 M811 M812 M813<br>M814 M815 M816 M818<br>M819 M820 M821 M828 | G03XC01 M05BB03<br>M05BA04 M05BA06<br>M05BA07                                 |
| <b>Parkinson disease</b>           | G209 G210 G211 G212 G213<br>G214 G218 G219 G229 G232                                                                                                                                                                                                                                                                                                                                                      | N04BA02 N04BA03 N04BC01<br>N04BC04 N04BC05 N04BC06<br>N04BC07 N04BC09 N04BD01 |

|                                       |                                                                                                                                                                                                                                                                                                                                                                                                                                                                                                                                                                                                                    |                                                                                                                     |
|---------------------------------------|--------------------------------------------------------------------------------------------------------------------------------------------------------------------------------------------------------------------------------------------------------------------------------------------------------------------------------------------------------------------------------------------------------------------------------------------------------------------------------------------------------------------------------------------------------------------------------------------------------------------|---------------------------------------------------------------------------------------------------------------------|
|                                       |                                                                                                                                                                                                                                                                                                                                                                                                                                                                                                                                                                                                                    | N04BD02 N04BX01 N04BX02<br>N04BC07 N04BC06 N04BC04                                                                  |
| <b>Arthritis</b>                      | M050 M051 M052 M053<br>M058 M059 M060 M061<br>M062 M063 M068 M069<br>M080 M081 M082 M083<br>M084 M088 M089 M070<br>M071 M072 M073 M074<br>M075 M076 M100 M101<br>M102 M103 M104 M109<br>M110 M111 M112 M118<br>M119 M121 M123 M124<br>M125 M126 M127 M128<br>M129 M130 M131 M138<br>M139 M140 M141 M142<br>M143 M144 M145 M146<br>M148 M300 M313 M315<br>M316 M319 M329 M459<br>L930 M150 M151 M152<br>M153 M154 M158 M159<br>M160 M161 M162 M163<br>M164 M165 M166 M167<br>M169 M170 M171 M172<br>M173 M174 M175 M179<br>M180 M181 M182 M183<br>M184 M185 M189 M190<br>M191 M192 M198 M199<br>M232 M201 M239 M479 | L04AA13                                                                                                             |
| <b>Disorders of the eyes and ears</b> | H250 H251 H252 H258 H259<br>H260 H261 H262 H263 H264<br>H268 H269 H262 H400 H401<br>H402 H403 H404 H405 H406<br>H408 H409 H420 H428 H445<br>H350 H351 H352 H353 H354<br>H355 H356 H357 H358 H359<br>H800 H801 H802 H808 H809<br>H810 H811 H812 H813 H814<br>H818 H819 H829 H900 H901<br>H902 H903 H904 H905 H906                                                                                                                                                                                                                                                                                                   | S01EA05 S01ED51 S01ED02<br>S01EC04 S01EC01 S01EC03<br>S01EB51 S01EE04 S01EE01<br>S01EE03 S01ED01 S01EC54<br>S01EE05 |

|                                        |                                                                                                                                                                                                                                                                                                                                                                                                                                                                                                                                    |                                            |
|----------------------------------------|------------------------------------------------------------------------------------------------------------------------------------------------------------------------------------------------------------------------------------------------------------------------------------------------------------------------------------------------------------------------------------------------------------------------------------------------------------------------------------------------------------------------------------|--------------------------------------------|
|                                        | H907 H908 H910 H913 H918<br>H919 H933 H938                                                                                                                                                                                                                                                                                                                                                                                                                                                                                         |                                            |
| <b>Epilepsy</b>                        | G400 G401 G402 G403 G404<br>G405 G406 G407 G408 G409                                                                                                                                                                                                                                                                                                                                                                                                                                                                               | N03AD01                                    |
| <b>Thyroid dysfunction</b>             | E010 E011 E012 E018 E029<br>E030 E031 E032 E033 E038<br>E039 E040 E041 E042 E048<br>E049 E050 E051 E052 E053<br>E054 E055 E058 E059 E060<br>E061 E062 E063 E064 E065<br>E069 I248                                                                                                                                                                                                                                                                                                                                                  | H03AA01 H03BA02 H03BB01<br>H03BB02 H03CA   |
| <b>Mental disorders due to alcohol</b> | F101 F102 F103 F104 F105<br>F106 F107 F108 F109 G312<br>K700 K701 K702 K703 K704<br>K709 K860                                                                                                                                                                                                                                                                                                                                                                                                                                      | N07BB01 N07BB03 N07BB05                    |
| <b>Obesity</b>                         | E660 E661 E662 E668 E669                                                                                                                                                                                                                                                                                                                                                                                                                                                                                                           | A08AB01 A08AA03                            |
| <b>Gastritis</b>                       | K210 K219 K221 K222 K254<br>K255 K256 K257 K258 K259<br>K264 K265 K266 K267 K268<br>K269 K274 K275 K276 K277<br>K278 K279 K284 K285 K286<br>K287 K288 K289 K292 K293<br>K294 K295                                                                                                                                                                                                                                                                                                                                                  |                                            |
| <b>Cardiac disease</b>                 | I062 I080 I081 I082 I083 I088<br>I089 I340 I341 I342 I348 I349<br>I350 I351 I352 I358 I359 I360<br>I361 I362 I368 I369 I370 I371<br>I372 I378 I379 Z952 Z953<br>Z954 I099 I420 I421 I422<br>I423 I424 I425 I426 I427 I428<br>I429 I500 I501 I200 I201 I208<br>I209 I248 I250 I251 I252 I253<br>I254 I255 I256 I258 I259 I210<br>I211 I212 I213 I214 I219 I230<br>I231 I232 I233 I234 I235 I236<br>I238 I260 I269 I270 I279 I440<br>I441 I442 I443 I444 I445 I446<br>I447 I450 I451 I452 I453 I454<br>I455 I456 I458 I459 I470 I471 | C01EB10 C01DA02 C01DA14<br>C01DX16 C01CA07 |



|                                                |                                                                                                                                                                                                                                                                              |                                                                                                                                                                                                                                 |
|------------------------------------------------|------------------------------------------------------------------------------------------------------------------------------------------------------------------------------------------------------------------------------------------------------------------------------|---------------------------------------------------------------------------------------------------------------------------------------------------------------------------------------------------------------------------------|
|                                                | I472 I479 I481 I482 I489 I490<br>I491 I492 I494 I495 I498 I499<br>Z950 I510 I511 I512 I513<br>I514 I515 I517 I518 I519                                                                                                                                                       |                                                                                                                                                                                                                                 |
| <b>Disorders of the lipoprotein metabolism</b> | E780 E781 E782 E783 E784<br>E785 E786 E788 E789 I652<br>I650 I651 I653 I658 I659 I660<br>I661 I662 I663 I664 I668 I669<br>I672 I700 I701 I702 I708 I709<br>I738 I739 I740 I741 I742 I743<br>I744 I745 I748 I749 K551<br>I710 I711 I712 I713 I714 I715<br>I716 I718 I719 I729 | C10AA01 C10AA02 C10AA03<br>C10AA04 C10AA05 C10AA07<br>C10AB02 C10AB04 C10AC02<br>C10AC04 C10AD06 C10AX09<br>C10AX13 C10BA02 C10BA05<br>B01AC30 B01AC24 B01AC04<br>B01AC07 B01AC22 B01AC09<br>B01AC06 B01AC11 B01AC16<br>B01AC13 |
| <b>Genitourinary diseases</b>                  | N393 N394 R329 N409 N411<br>N810 N811 N812 N813 N814<br>N815 N816 N817 N818 N819<br>N950                                                                                                                                                                                     | G04CA02 G04CA53 G04CA01<br>G04CB02 G04CA52 G04CB01                                                                                                                                                                              |

| <b>Supplementary file S3</b> Estimates for latent class regression analysis of healthcare utilization and healthcare complexity among the eight multimorbid patterns for women (n=68,687) |               |       |                                 |             |                                            |             |                                             |             |                                                     |             |                                               |             |                               |             |                                   |             |
|-------------------------------------------------------------------------------------------------------------------------------------------------------------------------------------------|---------------|-------|---------------------------------|-------------|--------------------------------------------|-------------|---------------------------------------------|-------------|-----------------------------------------------------|-------------|-----------------------------------------------|-------------|-------------------------------|-------------|-----------------------------------|-------------|
|                                                                                                                                                                                           | <b>Cancer</b> |       | <b>Cardiovascular disorders</b> |             | <b>Neurological and vascular disorders</b> |             | <b>Degenerative and pulmonary disorders</b> |             | <b>Degenerative, lifestyle and mental disorders</b> |             | <b>Metabolic and cardiovascular disorders</b> |             | <b>Complex multimorbidity</b> |             | <b>Neuropsychiatric disorders</b> |             |
| Outpatient visits                                                                                                                                                                         |               |       |                                 |             |                                            |             |                                             |             |                                                     |             |                                               |             |                               |             |                                   |             |
| Mean (SE)                                                                                                                                                                                 | 3.8           | (0.1) | 3.4                             | (0.1)       | 2.3                                        | (0.1)       | 4.1                                         | (0.1)       | 3.9                                                 | (0.1)       | 5.5                                           | (0.2)       | 6.4                           | (0.2)       | 3.9                               | (0.1)       |
| OR (95%CI) <sup>a</sup>                                                                                                                                                                   | Ref           |       | 0.95                            | (0.94-0.96) | 0.77                                       | (0.76-0.79) | 1.01                                        | (1.01-1.01) | 1.00                                                | (0.99-1.02) | 1.02                                          | (1.02-1.03) | 1.05                          | (1.04-1.05) | 1.01                              | (1.01-1.02) |
| GP visits                                                                                                                                                                                 |               |       |                                 |             |                                            |             |                                             |             |                                                     |             |                                               |             |                               |             |                                   |             |
| Mean (SE)                                                                                                                                                                                 | 8.2           | (0.1) | 10.8                            | (0.1)       | 8.9                                        | (0.1)       | 12.5                                        | (0.1)       | 10.6                                                | (0.1)       | 13.3                                          | (0.2)       | 14.2                          | (0.1)       | 11.                               | (0.1)       |
| OR (95%CI) <sup>a</sup>                                                                                                                                                                   | Ref           |       | 1.10                            | (1.10-1.11) | 1.00                                       | (0.99-1.00) | 1.14                                        | (1.14-1.15) | 1.10                                                | (1.09-1.11) | 1.14                                          | (1.13-1.14) | 1.17                          | (1.16-1.18) | 1.12                              | (1.11-1.13) |
| Specialists in private                                                                                                                                                                    |               |       |                                 |             |                                            |             |                                             |             |                                                     |             |                                               |             |                               |             |                                   |             |
| Mean (SE)                                                                                                                                                                                 | 1.1           | (0.0) | 1.1                             | (0.0)       | 0.9                                        | (0.0)       | 1.3                                         | (0.0)       | 0.8                                                 | (0.0)       | 1.1                                           | (0.0)       | 6.7                           | (0.1)       | 0.8                               | (0.0)       |
| OR (95%CI) <sup>a</sup>                                                                                                                                                                   | Ref           |       | 1.08                            | (1.06-1.10) | 0.99                                       | (0.97-1.01) | 1.19                                        | (1.17-1.21) | 0.92                                                | (0.87-0.97) | 1.11                                          | (1.09-1.13) | 1.19                          | (1.17-1.21) | 0.94                              | (0.91-0.97) |
| Admissions                                                                                                                                                                                |               |       |                                 |             |                                            |             |                                             |             |                                                     |             |                                               |             |                               |             |                                   |             |
| Mean (SE)                                                                                                                                                                                 | 0.9           | (0.0) | 1.0                             | (0.0)       | 0.8                                        | (0.0)       | 1.2                                         | (0.0)       | 1.4                                                 | (0.0)       | 1.5                                           | (0.0)       | 1.8                           | (0.0)       | 1.7                               | (0.0)       |
| OR (95%CI) <sup>a</sup>                                                                                                                                                                   | Ref           |       | 0.99                            | (0.95-1.02) | 0.72                                       | (0.69-0.75) | 1.24                                        | (1.19-1.28) | 1.63                                                | (1.56-1.70) | 1.37                                          | (1.33-1.42) | 1.66                          | (1.60-1.72) | 1.60                              | (1.54-1.65) |
| Acute admissions                                                                                                                                                                          |               |       |                                 |             |                                            |             |                                             |             |                                                     |             |                                               |             |                               |             |                                   |             |
| Mean (SE)                                                                                                                                                                                 | 0.7           | (0.0) | 0.8                             | (0.0)       | 0.7                                        | (0.0)       | 1.0                                         | (0.0)       | 1.2                                                 | (0.1)       | 1.1                                           | (0.0)       | 1.5                           | (0.0)       | 1.6                               | (0.0)       |
| OR (95%CI) <sup>a</sup>                                                                                                                                                                   | Ref           |       | 1.07                            | (1.02-1.11) | 0.83                                       | (0.79-0.87) | 1.39                                        | (1.34-1.45) | 1.97                                                | (1.89-2.06) | 1.48                                          | (1.42-1.54) | 2.11                          | (2.04-2.20) | 2.04                              | (1.97-2.11) |
| Cummulated LOS                                                                                                                                                                            |               |       |                                 |             |                                            |             |                                             |             |                                                     |             |                                               |             |                               |             |                                   |             |
| Mean (SE)                                                                                                                                                                                 | 4.4           | (0.1) | 4.6                             | (0.1)       | 4.7                                        | (0.1)       | 6.5                                         | (0.1)       | 9.1                                                 | (0.2)       | 7.5                                           | (0.3)       | 11.3                          | (0.2)       | 12.0                              | (0.3)       |
| OR (95%CI) <sup>a</sup>                                                                                                                                                                   | Ref           |       | 0.99                            | (0.99-1.00) | 0.94                                       | (0.93-0.95) | 1.03                                        | (1.03-1.04) | 1.07                                                | (1.07-1.08) | 1.04                                          | (1.03-1.04) | 1.07                          | (1.07-1.08) | 1.07                              | (1.07-1.08) |
| Diff. specialists (private)                                                                                                                                                               |               |       |                                 |             |                                            |             |                                             |             |                                                     |             |                                               |             |                               |             |                                   |             |
| Mean (SE)                                                                                                                                                                                 | 0.7           | (0.0) | 0.8                             | (0.0)       | 0.6                                        | (0.0)       | 1.0                                         | (0.0)       | 0.6                                                 | (0.0)       | 0.9                                           | (0.0)       | 1.0                           | (0.1)       | 0.6                               | (0.0)       |
| OR (95%CI) <sup>a</sup>                                                                                                                                                                   | Ref           |       | 1.22                            | (1.18-1.26) | 0.98                                       | (0.94-1.03) | 1.46                                        | (1.41-1.51) | 0.77                                                | (0.71-0.83) | 1.31                                          | (1.26-1.36) | 1.50                          | (1.44-1.55) | 0.89                              | (0.85-0.93) |
| Diff. specialists (Secondary)                                                                                                                                                             |               |       |                                 |             |                                            |             |                                             |             |                                                     |             |                                               |             |                               |             |                                   |             |
| Mean (SE)                                                                                                                                                                                 | 4.2           | (0.0) | 4.4                             | (0.0)       | 3.7                                        | (0.0)       | 6.0                                         | (0.1)       | 3.7                                                 | (0.1)       | 6.7                                           | (0.3)       | 6.3                           | (0.4)       | 3.8                               | (0.1)       |
| OR (95%CI) <sup>a</sup>                                                                                                                                                                   | Ref           |       | 1.13                            | (1.12-1.14) | 0.99                                       | (0.97-1.00) | 1.34                                        | (1.32-1.36) | 1.02                                                | (1.00-1.05) | 1.27                                          | (1.25-1.29) | 1.42                          | (1.40-1.44) | 1.09                              | (1.07-1.11) |
| Diff. reasons for admission                                                                                                                                                               |               |       |                                 |             |                                            |             |                                             |             |                                                     |             |                                               |             |                               |             |                                   |             |
| Mean (SE)                                                                                                                                                                                 | 0.6           | (0.0) | 0.7                             | (0.0)       | 0.5                                        | (0.0)       | 0.8                                         | (0.0)       | 3.3                                                 | (0.1)       | 0.9                                           | (0.0)       | 4.6                           | (0.1)       | 1.3                               | (0.0)       |
| OR (95%CI) <sup>a</sup>                                                                                                                                                                   | Ref           |       | 1.05                            | (1.01-1.08) | 0.79                                       | (0.76-0.82) | 1.32                                        | (1.28-1.36) | 1.86                                                | (1.80-1.92) | 1.46                                          | (1.41-1.51) | 2.10                          | (2.03-2.16) | 2.09                              | (2.03-2.15) |

Note: <sup>a</sup>Adjusted for age

| <b>Supplementary file S4</b> Estimates for latent class regression analysis of healthcare utilization and healthcare complexity among the eight multimorbid patterns for men (n=61,213) |               |       |                                 |             |                                            |             |                                         |             |                                       |             |                                             |             |                                               |             |                                   |             |
|-----------------------------------------------------------------------------------------------------------------------------------------------------------------------------------------|---------------|-------|---------------------------------|-------------|--------------------------------------------|-------------|-----------------------------------------|-------------|---------------------------------------|-------------|---------------------------------------------|-------------|-----------------------------------------------|-------------|-----------------------------------|-------------|
|                                                                                                                                                                                         | <b>Cancer</b> |       | <b>Cardiovascular disorders</b> |             | <b>Neurological and vascular disorders</b> |             | <b>Dementia and Parkinson's Disease</b> |             | <b>Lifestyle and mental disorders</b> |             | <b>Degenerative and pulmonary disorders</b> |             | <b>Metabolic and cardiovascular disorders</b> |             | <b>Neuropsychiatric disorders</b> |             |
| Outpatient visits                                                                                                                                                                       |               |       |                                 |             |                                            |             |                                         |             |                                       |             |                                             |             |                                               |             |                                   |             |
| Mean (SE)                                                                                                                                                                               | 4.8           | (0.1) | 4.1                             | (0.1)       | 2.7                                        | (0.1)       | 2.2                                     | (0.1)       | 4.8                                   | (0.1)       | 6.3                                         | (0.1)       | 7.5                                           | (0.2)       | 4.8                               | (0.1)       |
| OR (95%CI) <sup>a</sup>                                                                                                                                                                 | Ref           |       | 0.94                            | (0.94-0.96) | 0.82                                       | (0.80-0.84) | 0.82                                    | (0.80-0.84) | 0.98                                  | (0.97-0.99) | 1.03                                        | (1.03-1.03) | 1.03                                          | (1.03-1.04) | 1.00                              | (1.00-1.01) |
| GP visits                                                                                                                                                                               |               |       |                                 |             |                                            |             |                                         |             |                                       |             |                                             |             |                                               |             |                                   |             |
| Mean (SE)                                                                                                                                                                               | 8.4           | (0.1) | 11.1                            | (0.1)       | 7.6                                        | (0.1)       | 9.4                                     | (0.2)       | 10.7                                  | (0.2)       | 14.1                                        | (0.1)       | 14.0                                          | (0.1)       | 11.9                              | (0.1)       |
| OR (95%CI) <sup>a</sup>                                                                                                                                                                 | Ref           |       | 1.06                            | (1.06-1.07) | 0.97                                       | (0.96-0.98) | 1.03                                    | (1.02-1.04) | 1.09                                  | (1.08-1.10) | 1.14                                        | (1.14-1.15) | 1.13                                          | (1.13-1.14) | 1.10                              | (1.09-1.10) |
| Specialists in private                                                                                                                                                                  |               |       |                                 |             |                                            |             |                                         |             |                                       |             |                                             |             |                                               |             |                                   |             |
| Mean (SE)                                                                                                                                                                               | 0.8           | (0.0) | 0.8                             | (0.0)       | 0.8                                        | (0.0)       | 0.7                                     | (0.0)       | 0.6                                   | (0.0)       | 5.8                                         | (0.1)       | 1.2                                           | (0.0)       | 0.8                               | (0.0)       |
| OR (95%CI) <sup>a</sup>                                                                                                                                                                 | Ref           |       | 1.03                            | (1.02-1.05) | 1.02                                       | (0.99-1.04) | 1.06                                    | (1.01-1.12) | 0.95                                  | (0.90-1.01) | 1.29                                        | (1.26-1.31) | 1.19                                          | (1.17-1.21) | 1.04                              | (1.02-1.06) |
| Admissions                                                                                                                                                                              |               |       |                                 |             |                                            |             |                                         |             |                                       |             |                                             |             |                                               |             |                                   |             |
| Mean (SE)                                                                                                                                                                               | 1.1           | (0.0) | 1.1                             | (0.0)       | 0.7                                        | (0.0)       | 1.0                                     | (0.0)       | 1.8                                   | (0.0)       | 1.7                                         | (0.0)       | 1.8                                           | (0.0)       | 1.8                               | (0.0)       |
| OR (95%CI) <sup>a</sup>                                                                                                                                                                 | Ref           |       | 0.92                            | (0.89-0.94) | 0.67                                       | (0.63-0.70) | 0.93                                    | (0.89-0.98) | 1.35                                  | (1.31-1.40) | 1.46                                        | (1.41-1.50) | 1.36                                          | (1.33-1.40) | 1.38                              | (1.35-1.42) |
| Acute admissions                                                                                                                                                                        |               |       |                                 |             |                                            |             |                                         |             |                                       |             |                                             |             |                                               |             |                                   |             |
| Mean (SE)                                                                                                                                                                               | 0.7           | (0.0) | 0.8                             | (0.0)       | 0.6                                        | (0.0)       | 0.9                                     | (0.0)       | 1.5                                   | (0.0)       | 1.3                                         | (0.0)       | 1.4                                           | (0.0)       | 1.5                               | (0.0)       |
| OR (95%CI) <sup>a</sup>                                                                                                                                                                 | Ref           |       | 0.93                            | (0.90-0.96) | 0.72                                       | (0.68-0.76) | 1.18                                    | (1.12-1.24) | 1.73                                  | (1.67-1.80) | 1.76                                        | (1.70-1.83) | 1.66                                          | (1.60-1.71) | 1.73                              | (1.68-1.79) |
| Cummulated LOS                                                                                                                                                                          |               |       |                                 |             |                                            |             |                                         |             |                                       |             |                                             |             |                                               |             |                                   |             |
| Mean (SE)                                                                                                                                                                               | 5.2           | (0.1) | 5.1                             | (0.1)       | 4.1                                        | (0.2)       | 6.1                                     | (0.3)       | 10.3                                  | (0.4)       | 9.5                                         | (0.2)       | 10.7                                          | (0.2)       | 11.7                              | (0.2)       |
| OR (95%CI) <sup>a</sup>                                                                                                                                                                 | Ref           |       | 0.97                            | (0.97-0.98) | 0.91                                       | (0.90-0.93) | 1.00                                    | (0.99-1.01) | 1.05                                  | (1.04-1.05) | 1.05                                        | (1.04-1.05) | 1.05                                          | (1.04-1.05) | 1.05                              | (1.05-1.06) |
| Diff. specialists (private)                                                                                                                                                             |               |       |                                 |             |                                            |             |                                         |             |                                       |             |                                             |             |                                               |             |                                   |             |
| Mean (SE)                                                                                                                                                                               | 0.5           | (0.0) | 0.5                             | (0.0)       | 0.6                                        | (0.0)       | 0.5                                     | (0.0)       | 0.4                                   | (0.0)       | 2.6                                         | (0.0)       | 0.8                                           | (0.0)       | 0.6                               | (0.0)       |
| OR (95%CI) <sup>a</sup>                                                                                                                                                                 | Ref           |       | 1.12                            | (1.09-1.16) | 1.04                                       | (1.00-1.09) | 0.88                                    | (0.80-0.96) | 0.87                                  | (0.80-0.95) | 1.72                                        | (1.65-1.80) | 1.58                                          | (1.53-1.63) | 1.08                              | (1.04-1.13) |
| Diff. specialists (Secondary)                                                                                                                                                           |               |       |                                 |             |                                            |             |                                         |             |                                       |             |                                             |             |                                               |             |                                   |             |
| Mean (SE)                                                                                                                                                                               | 4.3           | (0.0) | 4.7                             | (0.0)       | 4.1                                        | (0.1)       | 2.7                                     | (0.0)       | 4.7                                   | (0.1)       | 6.7                                         | (0.2)       | 6.6                                           | (0.1)       | 4.3                               | (0.0)       |
| OR (95%CI) <sup>a</sup>                                                                                                                                                                 | Ref           |       | 1.10                            | (1.09-1.11) | 0.97                                       | (0.96-0.99) | 0.76                                    | (0.73-0.79) | 1.05                                  | (1.02-1.07) | 1.36                                        | (1.34-1.38) | 1.30                                          | (1.29-1.32) | 1.09                              | (1.07-1.10) |
| Diff. reasons for admission                                                                                                                                                             |               |       |                                 |             |                                            |             |                                         |             |                                       |             |                                             |             |                                               |             |                                   |             |
| Mean (SE)                                                                                                                                                                               | 0.7           | (0.0) | 0.6                             | (0.0)       | 0.5                                        | (0.0)       | 0.7                                     | (0.0)       | 6.1                                   | (0.1)       | 3.6                                         | (0.0)       | 1                                             | (0.0)       | 1.6                               | (0.0)       |
| OR (95%CI) <sup>a</sup>                                                                                                                                                                 | Ref           |       | 0.96                            | (0.94-0.99) | 0.72                                       | (0.69-0.76) | 1.09                                    | (1.04-1.15) | 1.67                                  | (1.61-1.72) | 1.68                                        | (1.63-1.73) | 1.65                                          | (1.60-1.69) | 1.75                              | (1.71-1.79) |

Note: <sup>a</sup>Adjusted for age
